# Supplementary material
Source: PubMed Central journal article supplement (PMC123072)
Supplement: pnas_99_12_8360__1.pdf [file pnas_99_12_8360__1.pdf]

**Table 2. Neuropeptides, channels, and growth-associated proteins expressed in control DRG and axotomized DRG**

| Accession no.       | Gene name                                                | cDNA array(14d) |            | Accession no.                    | Gene name                                                                 | cDNA array(14d) |            |
|---------------------|----------------------------------------------------------|-----------------|------------|----------------------------------|---------------------------------------------------------------------------|-----------------|------------|
|                     |                                                          | Con (nVol)      | Axo (nVol) |                                  |                                                                           | Con (nVol)      | Axo (nVol) |
| <b>Neuropeptide</b> |                                                          |                 |            | U35174                           | Sodium channel SHRSPHD beta subunit                                       | 0.019           | 0.018      |
| V01231              | Calcitonin gene-related peptide                          | 0.922           | 0.391      | X77933                           | Sodium channel SHRSPHD gamma subunit                                      | 0.010           | 0.015      |
| S70690              | Cholecystokinin                                          | 0.021           | 0.254      | X70521                           | Amiloride sensitive sodium channel alpha subunit                          | 0.011           | 0.013      |
| J03624              | Galanin                                                  | 0.021           | 0.624      | X92184                           | Voltage-gated sodium channel (SNS)                                        | 0.084           | 0.031      |
| M31176              | Gastrin-releasing peptide precursor                      | 0.011           | 0.013      | AF000368                         | Voltage-gated sodium channel                                              | 1.457           | 1.018      |
| M29712              | Melanin-concentrating hormone                            | 0.006           | 0.008      | Y09164                           | Voltage-gated sodium channel (atypical)                                   | 0.283           | 0.266      |
| NM_012994           | Neurexophilin 1                                          | 0.298           | 0.383      | AF049239                         | Voltage-gated sodium channel rPN4                                         | 1.048           | 0.783      |
| M16410              | Neurokinin B precursor                                   | 0.284           | 0.237      | M28647                           | Na <sup>+</sup> , K <sup>+</sup> -ATPase alpha-1 subunit                  | 0.145           | 0.121      |
| M94555              | Neuromedin U-23 precursor                                | 0.007           | 0.013      | NM_012505                        | ATPase, Na <sup>+</sup> /K <sup>+</sup> transporting, alpha 2 polypeptide | 0.721           | 0.832      |
| M20373              | Neuropeptide Y                                           | 0.008           | 2.441      | J02701                           | Na <sup>+</sup> , K <sup>+</sup> -ATPase beta subunit                     | 1.600           | 1.690      |
| M17523              | Peptide YY precursor                                     | 0.008           | 0.014      | NM_013113                        | ATPase, Na <sup>+</sup> /K <sup>+</sup> transporting, beta 1 polypeptide  | 0.351           | 0.614      |
| M63006              | Pituitary adenylate cyclase activating polypeptide       | 0.056           | 0.104      | NM_012913                        | ATPase, Na <sup>+</sup> /K <sup>+</sup> transporting, beta 3 polypeptide  | 0.408           | 0.284      |
| NM_012659           | Somatostatin                                             | 0.413           | 0.152      | X70062                           | Na <sup>+</sup> , K <sup>+</sup> -ATPase gamma subunit                    | 2.030           | 2.180      |
| M15191              | Tachykinin                                               | 2.872           | 1.212      | AF071863                         | Bumetanide-sensitive Na-K-2Cl cotransporter                               | 0.262           | 0.407      |
| X02341              | Vasoactive intestinal polypeptide                        | 0.011           | 0.152      | AF051561                         | Na-K-Cl cotransporter                                                     | 0.623           | 0.340      |
| <b>Channel</b>      |                                                          |                 |            | AF125160                         | Na-G/SCL-11 ion channel                                                   | 0.975           | 0.521      |
| NM_031353           | Voltage dependent anion channel 1                        | 1.284           | 1.503      | D17695                           | Water channel aquaporin 3                                                 | 0.324           | 0.313      |
| NM_031354           | Voltage dependent anion channel 2                        | 0.134           | 0.147      | U14007                           | Water channel, aquaporin 4                                                | 0.010           | 0.010      |
| AF268469            | Voltage dependent anion channel 3                        | 0.939           | 1.061      | D13906                           | ADH water channel                                                         | 0.016           | 0.015      |
| J05087              | Ca <sup>2+</sup> -transporting ATPase                    | 0.095           | 0.073      | <b>Growth-associated protein</b> |                                                                           |                 |            |
| BG668716            | ATPase, Ca <sup>2+</sup> transporting, plasma membrane 1 | 0.267           | 0.404      | D38629                           | Adenomatous polyposis coli orotein                                        | 0.012           | 0.034      |
| M64373              | Calcium channel, alpha 1A subunit                        | 0.039           | 0.042      | X17457                           | Ciliary neurotrophic factor                                               | 0.974           | 1.336      |
| M59786              | Calcium channel, alpha 1C subunit                        | 0.072           | 0.054      | U13253                           | DA11=15.2 kDa fatty acid binding protein                                  | 0.751           | 2.214      |
| M57682              | Calcium channel, alpha 1D subunit                        | 0.008           | 0.012      | M22427                           | Basic fibroblast growth factor                                            | 0.047           | 0.095      |
| M92905              | Calcium channel, alpha 1 beta                            | 0.020           | 0.025      | NM_012513                        | Brain derived neurotrophic factor                                         | 0.461           | 0.686      |
| M86621              | L-type calcium channel, alpha 2/delta-1 subunit          | 0.023           | 0.139      | U95001                           | Developmentally-regulated cardiac factor                                  | 1.122           | 0.429      |
| X61394              | Calcium channel, beta subunit                            | 0.012           | 0.013      | D64085                           | Fibroblast growth factor 5                                                | 0.020           | 0.021      |
| AF013598            | Proton gated cation channel drasic                       | 0.264           | 0.143      | X56551                           | Fibroblast growth factor 7                                                | 0.092           | 0.228      |
| Z67744              | Chloride channel CIC-7                                   | 0.031           | 0.032      | D14839                           | Fibroblast growth factor 9                                                | 0.010           | 0.010      |
| D17521              | Protein kinase C regulated chloride channel              | 0.045           | 0.054      | D79215                           | Fibroblast growth factor 10                                               | 0.463           | 0.465      |
| D13985              | Chloride channel RCL1                                    | 0.032           | 0.030      | AF271786                         | Fibroblast growth factor 13                                               | 4.441           | 1.320      |
| BG663996            | Chloride intracellular channel 4                         | 0.041           | 0.034      | BG666531                         | Fibroblast growth factor 14                                               | 0.182           | 0.244      |
| M77482              | Potassium channel CDRK                                   | 0.016           | 0.015      | BG662950                         | Fibroblast growth factor homologous factor 1                              | 0.334           | 0.372      |
| M74449              | Potassium channel cardiac delayed rectifier              | 0.025           | 0.028      | L15305                           | Glia cell line-derived neurotrophic factor                                | 0.014           | 0.021      |
| X16476              | Potassium channel drk1                                   | 0.240           | 0.170      | BG666787                         | Glia maturation factor-gamma                                              | 0.209           | 0.316      |
| M22412              | Potassium channel protein(put.)                          | 0.095           | 0.167      | L32591                           | Growth arrest and DNA-damage-inducible protein 45                         | 0.012           | 0.084      |
| X83580              | Potassium channel, inward rectifier 11                   | 0.091           | 0.023      | M16228                           | Growth associated protein 43                                              | 0.273           | 1.624      |
| L29403              | Epithelial potassium channel                             | 0.034           | 0.042      | L05489                           | Heparin-binding EGF-like growth factor                                    | 0.011           | 0.012      |
| L35771              | Potassium channel subfamily IKAch                        | 0.027           | 0.026      | M55601                           | Heparin-binding growth associated molecule                                | 2.523           | 2.557      |
| D42145              | ATP-sensitive potassium channel uKATP-1                  | 0.016           | 0.015      | X14232                           | Heparin-binding growth factor 1                                           | 0.022           | 0.031      |
| X83583              | Potassium channel-like protein KATP                      | 0.021           | 0.013      | S43941                           | Insulin-like growth factor I                                              | 0.634           | 0.475      |
| X97041              | Potassium channel Kir6.2                                 | 0.039           | 0.060      | M89791                           | Insulin-like growth factor binding protein 1                              | 0.124           | 0.112      |
| M26161              | Potassium channel protein                                | 0.027           | 0.028      | M31837                           | Insulin-like growth factor binding protein 3                              | 0.044           | 0.031      |
| M68880              | Voltage gated potassium channel KV3.1                    | 0.012           | 0.012      | BG664716                         | Mast cell growth factor                                                   | 0.307           | 0.257      |
| X62841              | Voltage gated potassium channel KV3.4                    | 0.020           | 0.026      | S73424                           | Macrophage migration inhibitory factor                                    | 0.793           | 1.228      |
| U89873              | Voltage gated potassium channel Kv4.1 like protein       | 0.096           | 0.157      | M36589                           | Beta nerve growth factor                                                  | 0.192           | 0.195      |
| X17621              | Potassium channel RCK2                                   | 0.014           | 0.012      | S83440                           | Prepronerve growth factor homolog                                         | 0.173           | 0.193      |
| X16001              | Potassium channel RCK3                                   | 0.047           | 0.025      | M60525                           | Nerve growth factor-inducible protein                                     | 0.003           | 0.019      |
| X16002              | Potassium channel RCK4                                   | 0.044           | 0.018      | U88958                           | Neuritin                                                                  | 1.169           | 1.320      |
| AF089730            | Potassium channel subunit (Slack)                        | 0.093           | 0.120      | M34643                           | Neurotrophin 3                                                            | 0.010           | 0.010      |
| AF022819            | Potassium channel TWIK                                   | 0.346           | 0.417      | D45201                           | Neurofibromin                                                             | 0.034           | 0.011      |
| M59980              | Voltage gated potassium channel (RK5)                    | 0.041           | 0.041      | L06894                           | Platelet-derived growth factor A-chain                                    | 0.970           | 0.784      |
| X12589              | Voltage dependent potassium channel                      | 0.173           | 0.163      | X55183                           | Schwannoma-derived growth factor                                          | 0.021           | 0.034      |
| M22253              | Sodium channel I                                         | 0.013           | 0.011      | J04979                           | Stathmin                                                                  | 0.430           | 0.630      |
| X03639              | Sodium channel II                                        | 0.041           | 0.049      | AF306458                         | Superiorcervical ganglion 10                                              | 2.422           | 5.521      |
| Y00766              | Sodium channel III                                       | 0.044           | 0.171      | AY004290                         | Superiorcervical ganglion 10-like protein                                 | 1.250           | 1.870      |
| M91808              | Sodium channel beta 1 subunit                            | 0.164           | 0.272      | BG664300                         | TMEFF2                                                                    | 1.765           | 3.061      |
| U37026              | Sodium channel beta 2 subunit (SCNB2)                    | 0.132           | 0.444      | NM_012671                        | Transforming growth factor, alpha subunit                                 | 0.052           | 0.065      |

d, day; DRG, dorsal root ganglion; nVol, normalized volume.
