# Supplementary material
Source: PubMed Central journal article supplement (PMC123072)
Supplement: pnas_99_12_8360__2.pdf [file pnas_99_12_8360__2.pdf]

**Table 3. Receptors expressed in control DRG and axotomized DRG**

| Accession no. | Gene name                                         | cDNA array(14d) |            | Accession no. | Gene name                                            | cDNA array(14d) |            |
|---------------|---------------------------------------------------|-----------------|------------|---------------|------------------------------------------------------|-----------------|------------|
|               |                                                   | Con (nVol)      | Axo (nVol) |               |                                                      | Con (nVol)      | Axo (nVol) |
| X74832        | Acetylcholine receptor alpha subunit              | 0.053           | 0.049      | U59809        | Insulin-like growth factor II receptor               | 0.023           | 0.023      |
| L31620        | Acetylcholine receptor alpha 4 subunit            | 0.055           | 0.053      | U12309        | Integrin beta-1 subunit                              | 0.031           | 0.043      |
| X74833        | Acetylcholine receptor beta subunit               | 0.019           | 0.020      | M95578        | Interleukin-1 receptor type I                        | 0.011           | 0.011      |
| X74834        | Acetylcholine receptor gamma subunit              | 0.010           | 0.010      | M55050        | Interleukin-2 receptor beta chain                    | 0.011           | 0.017      |
| X74836        | Acetylcholine receptor epsilon subunit            | 0.020           | 0.018      | M58587        | Interleukin-6 receptor ligand binding chain          | 0.014           | 0.015      |
| M16409        | Muscarinic acetylcholine receptor m4              | 0.021           | 0.025      | M92340        | Interleukin-6 receptor signal transducer             | 0.030           | 0.031      |
| L31621        | Nicotinic acetylcholine receptor alpha 3 subunit  | 0.016           | 0.013      | X77797        | Interleukin 8 receptor                               | 0.120           | 0.118      |
| J05231        | Nicotinic acetylcholine receptor alpha 5 subunit  | 0.477           | 0.433      | X61677        | Inositol triphosphate receptor type 2                | 0.023           | 0.037      |
| L08227        | Nicotinic acetylcholine receptor alpha 6 subunit  | 0.013           | 0.018      | L06096        | Inositol triphosphate receptor type 3                | 0.130           | 0.129      |
| L31619        | Nicotinic acetylcholine receptor alpha 7 subunit  | 0.010           | 0.038      | U72487        | Calcium-independent alpha-latrotoxin receptor        | 0.018           | 0.014      |
| L31622        | Nicotinic acetylcholine receptor beta 2 subunit   | 0.059           | 0.063      | X13722        | Low-density lipoprotein receptor                     | 0.053           | 0.154      |
| L31771        | Adrenergic receptor alpha 1A/D                    | 0.029           | 0.026      | X61479        | Macrophage colony stimulating factor 1 receptor      | 0.017           | 0.018      |
| NM_016991     | Adrenergic receptor alpha 1B                      | 0.024           | 0.032      | U67863        | Melanocortin 4 receptor                              | 0.065           | 0.080      |
| U13368        | Adrenergic receptor alpha 1C                      | 0.012           | 0.011      | U52218        | Melatonin-related receptor                           | 0.030           | 0.028      |
| NM_012739     | Adrenergic receptor alpha 2A                      | 0.012           | 0.034      | NM_012964     | Hyaluronan-mediated motility receptor                | 0.207           | 0.144      |
| M58316        | Adrenergic receptor alpha 2B                      | 0.024           | 0.011      | L27339        | Natriuretic peptide receptor c                       | 0.020           | 0.017      |
| J03024        | Adrenergic receptor beta                          | 0.189           | 0.235      | X05137        | Fast nerve growth factor receptor                    | 0.264           | 0.236      |
| D00634        | Adrenergic receptor beta 1                        | 0.051           | 0.050      | U37058        | Neuromedin B receptor                                | 0.017           | 0.030      |
| J05122        | Benzodiazepine receptor peripheral-type           | 0.022           | 0.055      | Z11504        | Neuropeptide Y Y1 receptor                           | 0.343           | 0.188      |
| D38082        | Bone morphogenetic protein type IA receptor       | 0.015           | 0.019      | AY004257      | Neuropeptide Y Y2 receptor                           | 0.348           | 0.870      |
| AF004218      | Brain sigma receptor                              | 0.015           | 0.056      | U66274        | Neuropeptide Y Y5 receptor                           | 0.021           | 0.054      |
| BG665679      | Cadherin-related neuronal receptor 2              | 0.556           | 0.818      | AF016297      | Neuropilin 2                                         | 0.057           | 0.074      |
| BG670483      | Calcitonin receptor-like receptor                 | 0.148           | 0.169      | X97121        | Neurotensin receptor type 2                          | 0.044           | 0.016      |
| BG665273      | Cation-dependent mannose-6-phosphate receptor     | 0.862           | 0.919      | AF005099      | Neuronal pentraxin receptor                          | 0.045           | 0.058      |
| M88096        | Cholecystokinin receptor type A                   | 0.030           | 0.037      | X63255        | N-methyl-D-aspartate receptor                        | 0.036           | 0.031      |
| M99418        | Cholecystokinin receptor type B                   | 0.034           | 0.069      | AF003944      | Nuclear receptor rCOUPb                              | 0.076           | 0.107      |
| U16253        | Corticotropin-releasing factor receptor subtype 2 | 0.015           | 0.023      | AF003926      | Nuclear receptor rCOUPg                              | 0.053           | 0.056      |
| M36831        | Dopamine receptor subtype D2                      | 0.014           | 0.011      | U00475        | Opioid receptor delta-type                           | 0.014           | 0.008      |
| M84009        | Dopamine receptor subtype D4                      | 0.026           | 0.035      | D16829        | Opioid receptor kappa-type                           | 0.022           | 0.031      |
| M55636        | Heat-stable enterotoxin receptor                  | 0.019           | 0.028      | L20684        | Opioid receptor mu-type                              | 0.024           | 0.011      |
| M89954        | 5-hydroxytryptamine receptor 1B                   | 0.037           | 0.054      | U05239        | Opioid receptor-like orphan receptor                 | 0.013           | 0.018      |
| M21410        | 5-hydroxytryptamine receptor 1C                   | 0.034           | 0.031      | L27513        | Orphan nuclear receptor TR4                          | 0.080           | 0.090      |
| U59672        | 5-hydroxytryptamine receptor 3                    | 0.014           | 0.011      | U55836        | Parathyroid hormone receptor PTH2                    | 0.013           | 0.011      |
| U20907        | 5-hydroxytryptamine receptor 4L                   | 0.018           | 0.020      | BG668971      | Peroxisomal PTS2 receptor                            | 0.128           | 0.176      |
| L10073        | 5-hydroxytryptamine receptor 5B                   | 0.137           | 0.183      | Z14119        | Platelet-derived growth factor receptor beta subunit | 0.012           | 0.018      |
| U38665        | Inositol 1,4,5-triphosphate 3-kinase receptor 2   | 0.011           | 0.008      | AF025506      | Preylated rab acceptor 1                             | 0.352           | 0.373      |
| L08446        | Fc gamma receptor RIIH isoform                    | 3.421           | 5.981      | U94708        | Prostaglandin E2 receptor EP2 subtype                | 0.025           | 0.026      |
| M64368        | Class III Fc-gamma receptor                       | 2.229           | 2.253      | D14869        | Prostaglandin E2 receptor EP3 subtype                | 0.035           | 0.048      |
| D12498        | Fibroblast growth factor receptor 1               | 0.009           | 0.011      | U94709        | Prostaglandin E2 receptor EP4 subtype                | 0.075           | 0.071      |
| S74702        | G protein-coupled receptor 1                      | 0.019           | 0.016      | U47287        | Prostaglandin F2 alpha receptor                      | 0.024           | 0.011      |
| BG663495      | Very large G protein-coupled receptor 1           | 0.101           | 0.143      | NM_012763     | Protein tyrosine phosphatase receptor type A         | 0.517           | 0.958      |
| U65417        | G protein-coupled receptor 19                     | 0.025           | 0.025      | NM_013080     | Protein tyrosine phosphatase receptor type zeta      | 0.141           | 0.219      |
| AF087947      | G protein-coupled receptor GPCR/CNS2              | 1.904           | 1.748      | U03390        | Protein kinase C receptor                            | 2.246           | 2.081      |
| BG664012      | Orphan G protein-coupled receptor edg-1           | 0.678           | 0.720      | X91167        | Purinergic receptor P2X3                             | 0.078           | 0.065      |
| AF061443      | G protein-coupled receptor LGR4                   | 2.950           | 1.327      | U32497        | Purinergic receptor P2X4                             | 0.010           | 0.009      |
| M35297        | Probable G protein-coupled receptor RTA           | 0.029           | 0.036      | X97376        | Purinergic receptor P2X6                             | 0.024           | 0.017      |
| U10699        | G protein-coupled receptor pH218                  | 0.022           | 0.027      | NM_019256     | Purinergic receptor P2X7                             | 0.044           | 0.038      |
| D38450        | G protein-coupled receptor                        | 2.311           | 0.691      | U22830        | Purinergic receptor P2Y                              | 0.008           | 0.024      |
| S77867        | G protein-coupled receptor UHR-1                  | 0.057           | 0.123      | NM_017255     | Purinergic receptor P2Y2                             | 0.021           | 0.023      |
| L08490        | GABA-A receptor alpha 1 subunit                   | 0.049           | 0.034      | AF313450      | Purinergic receptor P2Y12                            | 0.022           | 0.021      |
| L08491        | GABA-A receptor alpha 2 subunit                   | 0.038           | 0.038      | U09402        | Purinergic receptor P2U                              | 0.019           | 0.020      |
| L08494        | GABA-A receptor alpha 5 subunit                   | 0.021           | 0.058      | M81766        | Nuclear receptor co-regulator 1                      | 0.025           | 0.026      |
| L08495        | GABA-A receptor alpha 6 subunit                   | 0.046           | 0.044      | BG664449      | Ryanodine receptor type 2                            | 0.360           | 0.514      |
| X15468        | GABA-A receptor beta 3 subunit                    | 0.091           | 0.137      | U76205        | Scavenger receptor class B type I                    | 0.042           | 0.050      |
| M35162        | GABA-A receptor delta subunit                     | 0.020           | 0.014      | X59132        | Secretin receptor                                    | 0.060           | 0.051      |
| L08497        | GABA-A receptor gamma 2 subunit                   | 0.028           | 0.022      | BG665818      | Serpentine receptor                                  | 0.480           | 0.572      |
| X95579        | GABA-A receptor rho 1 subunit                     | 0.014           | 0.016      | S76466        | Serine/threonine kinase receptor type I              | 0.012           | 0.011      |
| Y10369        | GABA-B receptor 1a subunit                        | 0.025           | 0.025      | L04535        | Somatostatin receptor 5                              | 0.031           | 0.028      |
| U30290        | Galanin receptor 1                                | 0.067           | 0.059      | AF019628      | Sulfonylurea receptor 2B                             | 0.708           | 1.075      |
| NM_012959     | GDNF receptor alpha                               | 0.022           | 0.074      | D21158        | Thromboxane A2 receptor                              | 0.023           | 0.036      |
| U97143        | GDNF receptor beta                                | 0.038           | 0.024      | M25071        | Thyroid hormone receptor                             | 0.016           | 0.023      |
| M83561        | Glutamate receptor subunit 5-2 kainate subtype    | 0.055           | 0.069      | M34842        | Thyroid stimulating hormone receptor                 | 0.043           | 0.024      |
| M92076        | Metabotropic glutamate receptor 3                 | 0.171           | 0.178      | M58040        | Transferrin receptor                                 | 0.012           | 0.014      |
| M90518        | Metabotropic glutamate receptor 4                 | 0.041           | 0.013      | L09653        | Transforming growth factor-b type II receptor        | 0.017           | 0.022      |
| D16817        | Metabotropic glutamate receptor 7                 | 0.044           | 0.028      | U87305        | Transmembrane receptor UNC5H1                        | 0.017           | 0.021      |
| L33413        | Advanced glycosylation end product receptor       | 0.027           | 0.026      | M63122        | Tumor necrosis factor receptor                       | 0.013           | 0.016      |
| D00833        | Glycine receptor alpha 1 subunit                  | 0.009           | 0.011      | BG663355      | TNF receptor superfamily member4                     | 0.182           | 0.286      |
| M55250        | Inhibitory glycine receptor alpha subunit         | 0.024           | 0.031      | BG663955      | Tyrosine kinase receptor                             | 0.120           | 0.178      |
| BG669994      | Domesticus glycine receptor beta subunit          | 0.942           | 0.888      | AF007789      | Urokinase receptor                                   | 0.032           | 0.041      |
| J04811        | Growth hormone receptor                           | 0.021           | 0.014      | AF158248      | Vanilloid receptor                                   | 0.745           | 0.515      |
| L04306        | High affinity IgE receptor gamma chain            | 0.190           | 0.298      | U09631        | Vasoactive intestinal polypeptide receptor 2         | 0.022           | 0.019      |
| M29014        | Insulin receptor                                  | 0.039           | 0.045      | Z11932        | Vasopressin V2 receptor                              | 0.170           | 0.176      |
| M90661        | Insulin receptor-related receptor alpha subunit   | 0.258           | 0.228      | J04147        | 1,25-dihydroxyvitamin D3 receptor                    | 0.012           | 0.011      |
| L29232        | Insulin-like growth factor I receptor             | 0.025           | 0.028      |               |                                                      |                 |            |

d, day; DRG, dorsal root ganglion; nVol, normalized volume.
